# Supplementary material for: A New Sesquilignan Glucoside from Uraria sinensis
Source: PubMed Central journal article supplement (PMC6271682; doi:10.3390/molecules19011178), 2014-01-17

# Supporting Information

Figure S1. HRESIMS spectrum of compound 1.

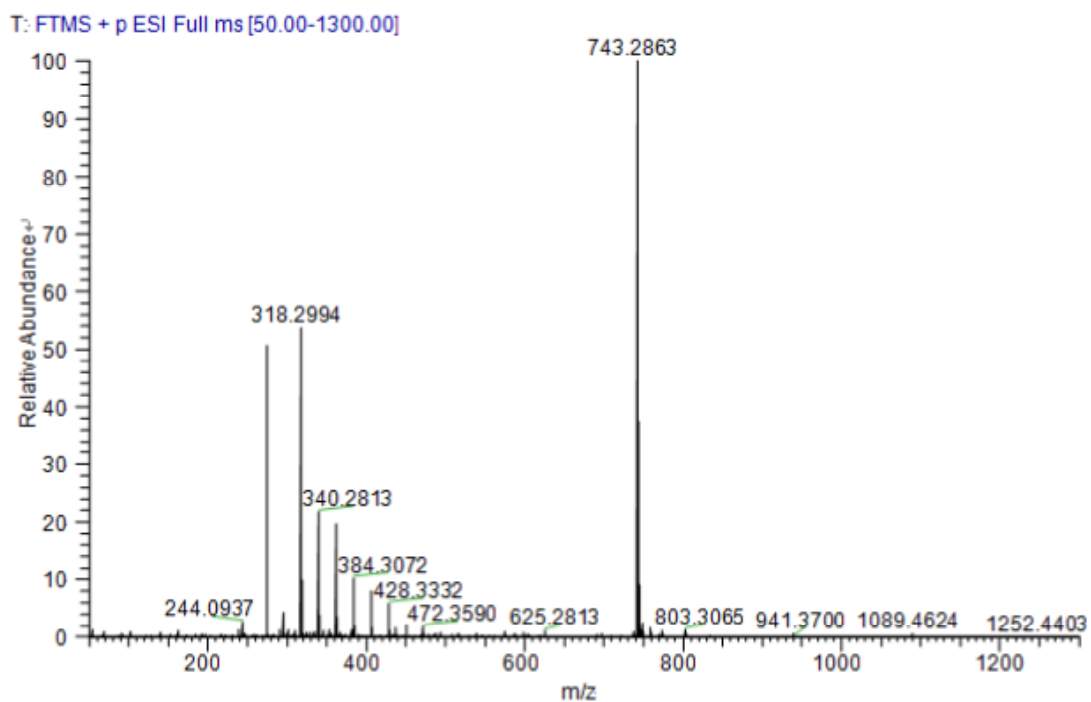

Figure S2. IR spectrum of compound 1.

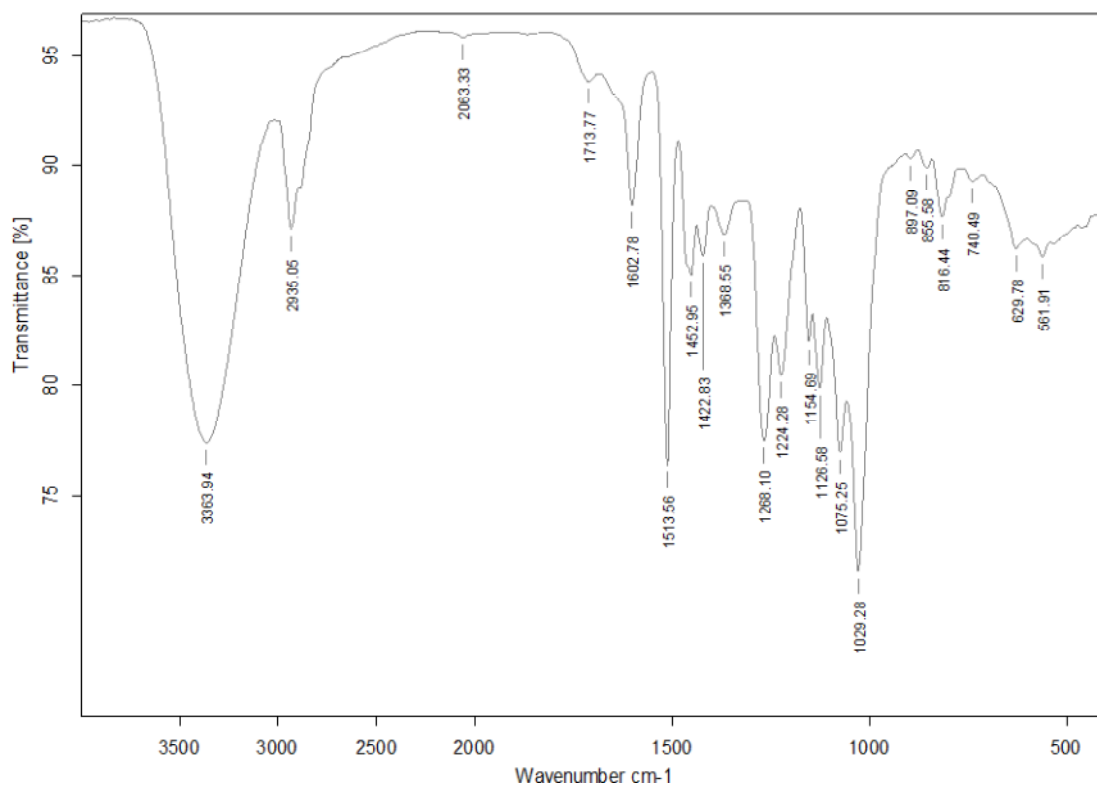

Figure S3. UV spectrum of compound 1.

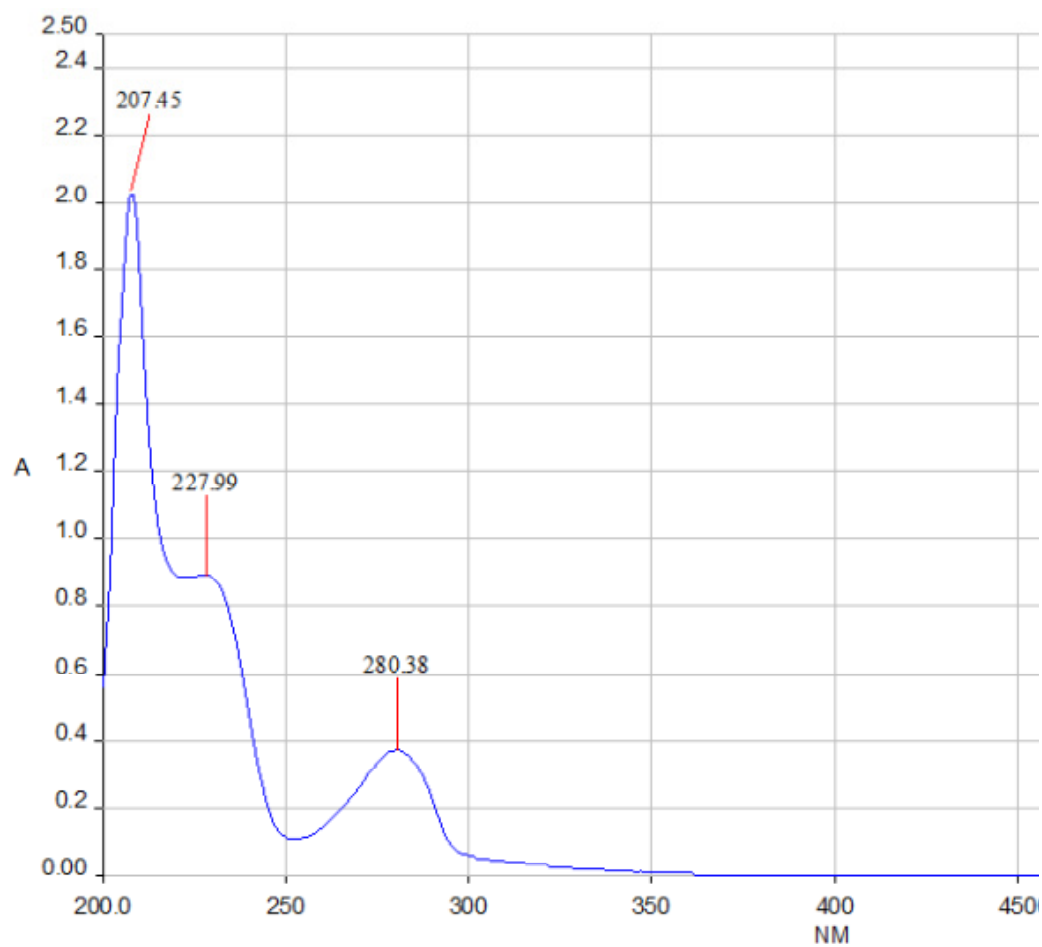Figure S4.  $^1\text{H-NMR}$  spectrum of 1.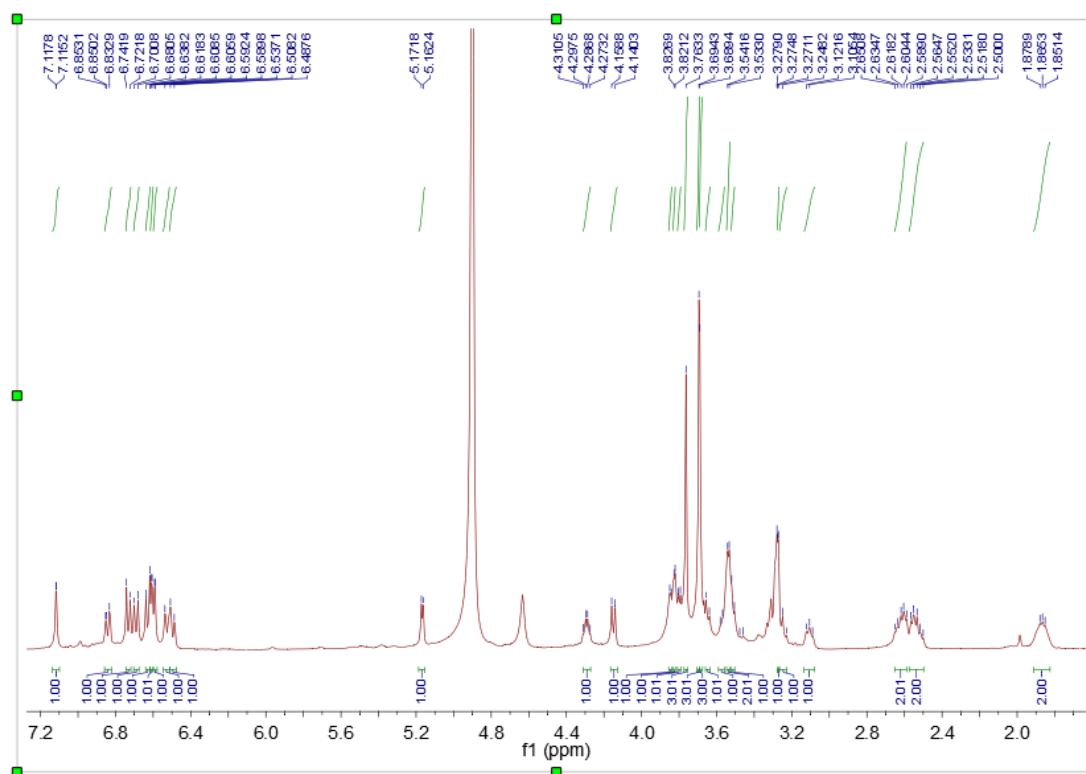

Figure S5.  $^{13}\text{C}$ -NMR and DEPT spectra of compound 1.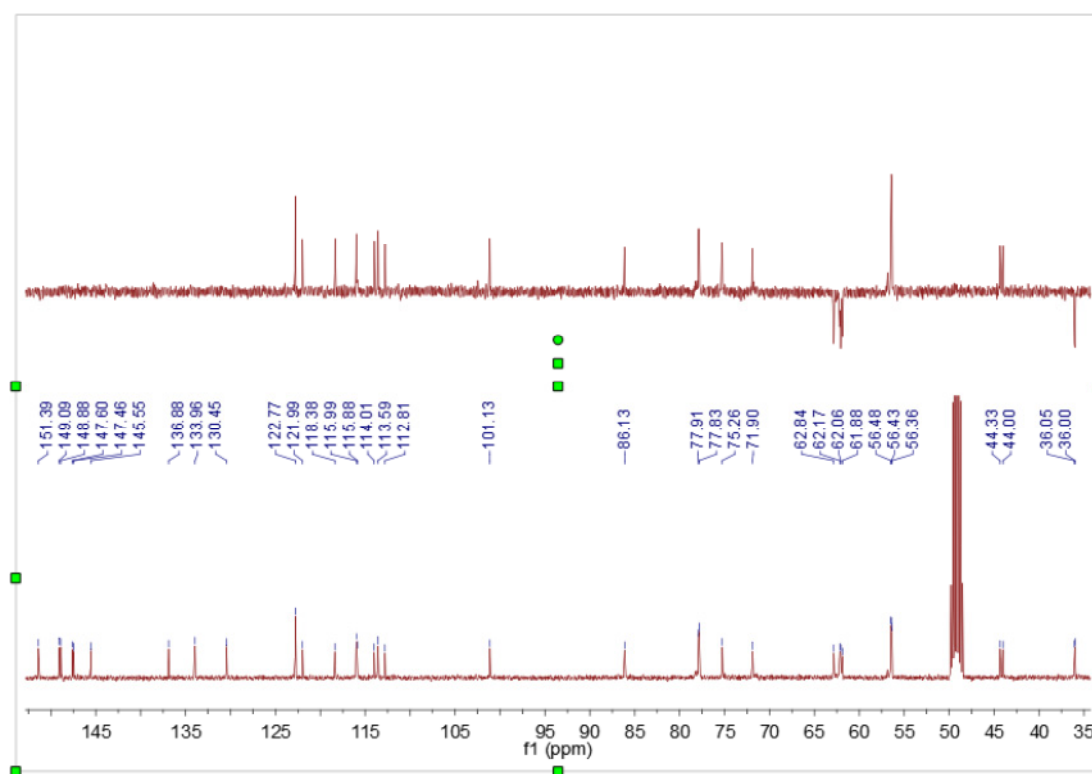

Figure S6. HSQC spectrum of compound 1.

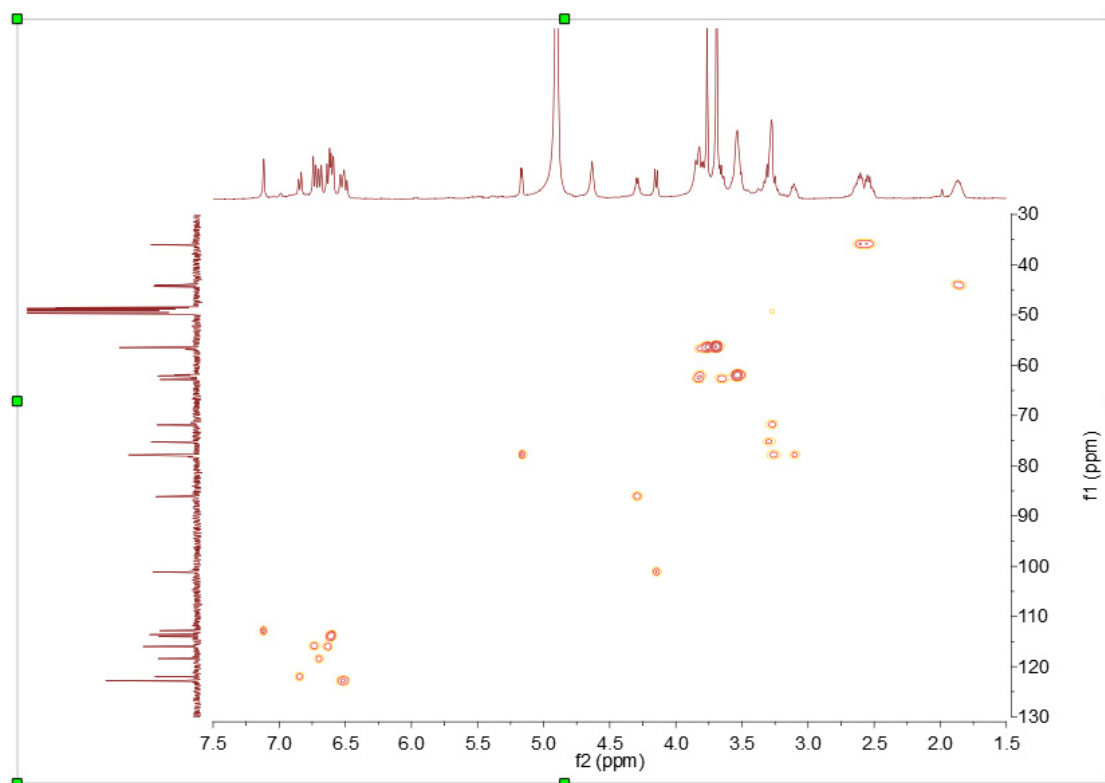

Figure S7. COSY spectrum of compound 1.

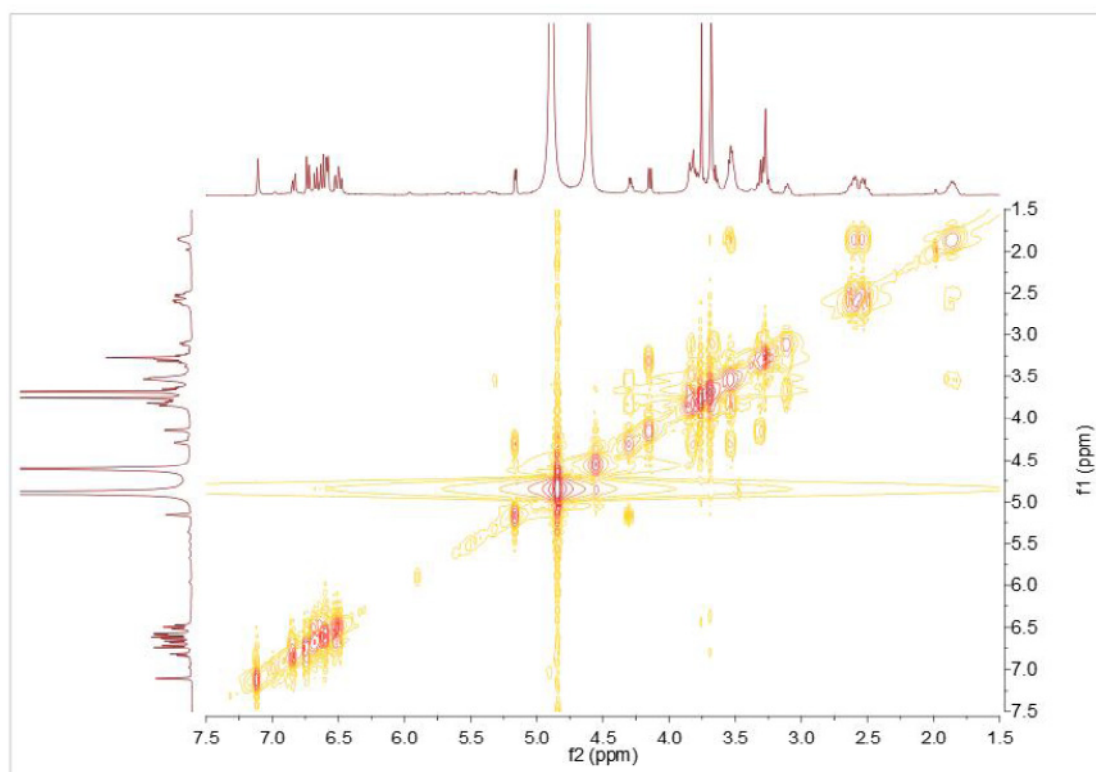

Figure S8. HMBC spectrum of compound 1.

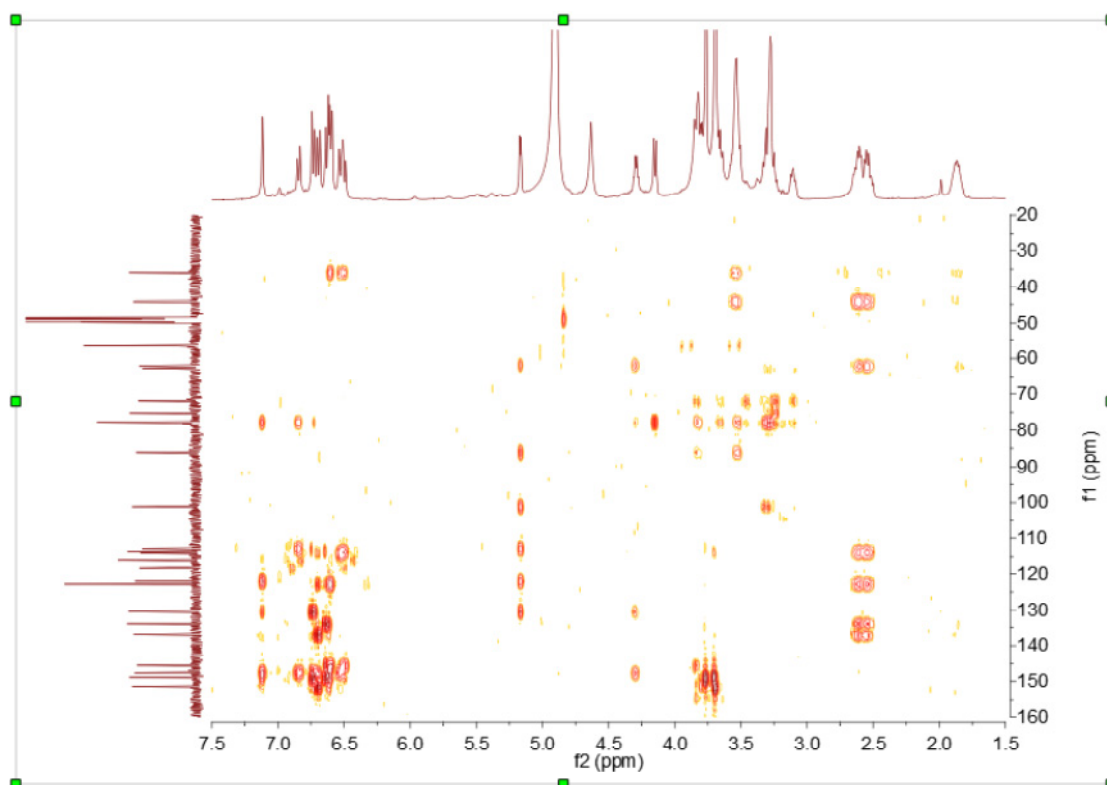

**Figure S9.** NOSEY spectrum of compound 1.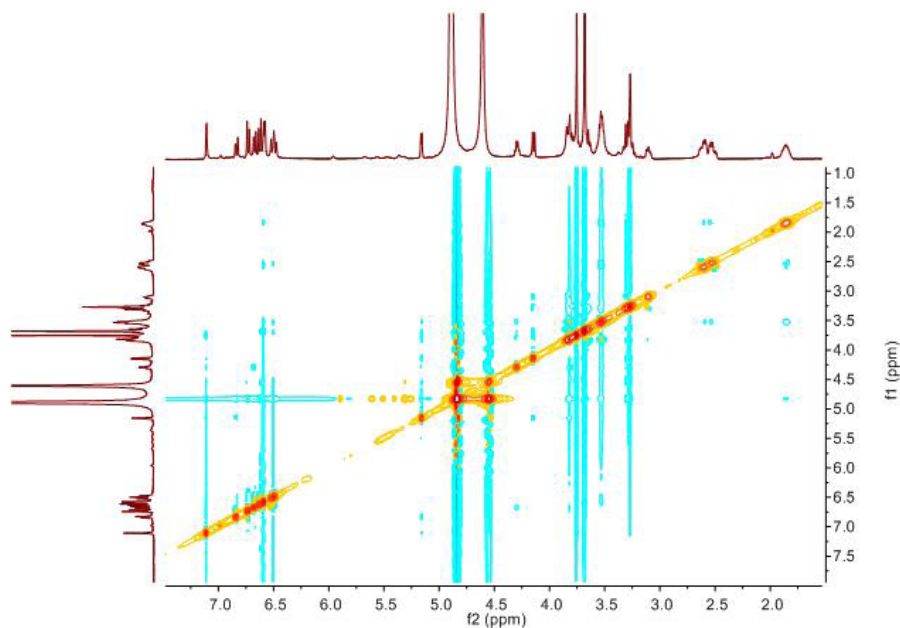**Figure S10.** GS analysis of the sugar of compound 1. (A) L-glucose; (B) D-Glucose; and (C) sugar of compound 1.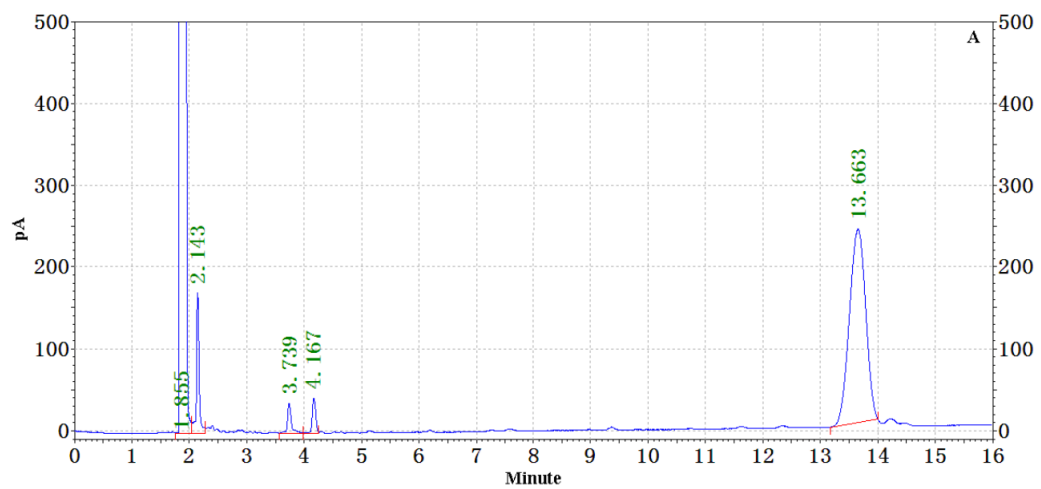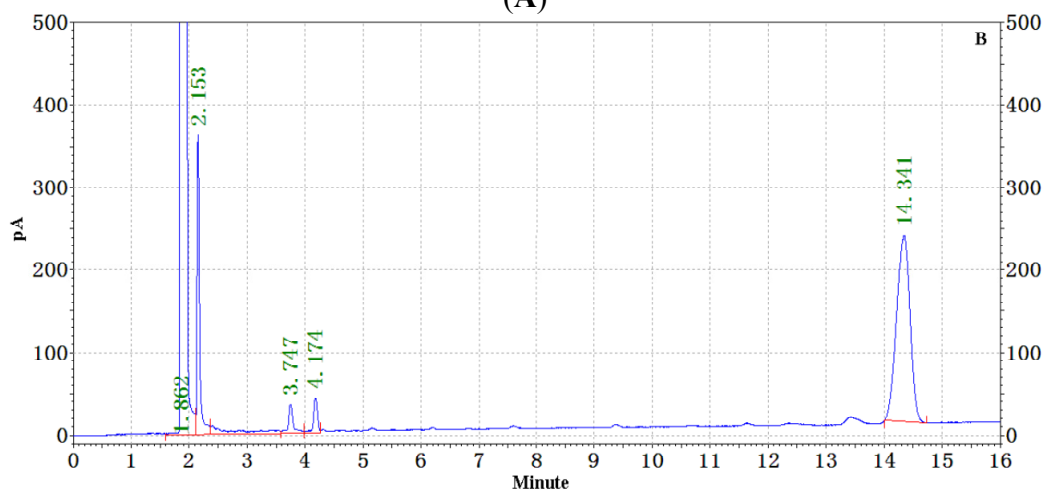**(B)**

Figure S10. Cont.

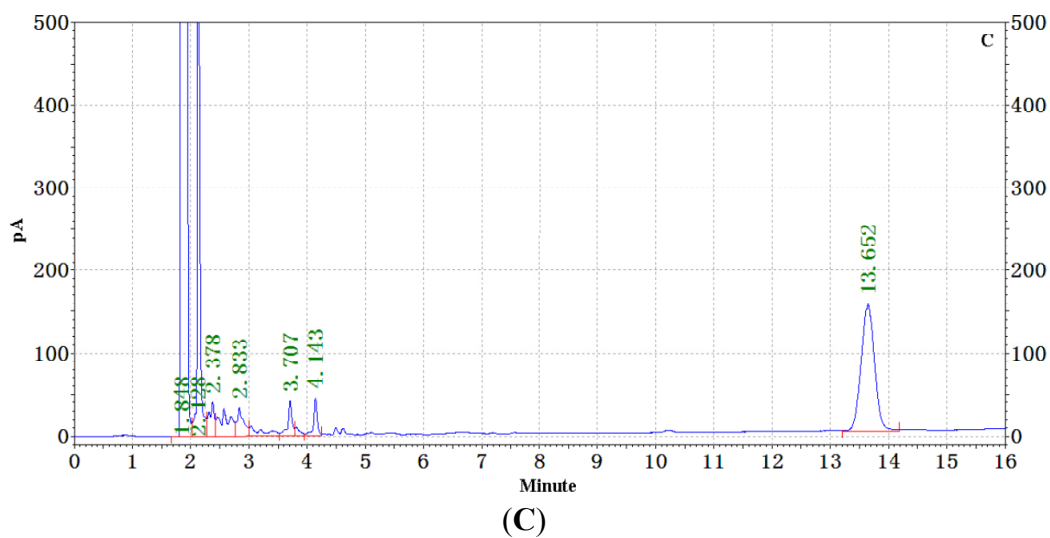

Figure S11. The CD Spectrum of 1 in MeOH.

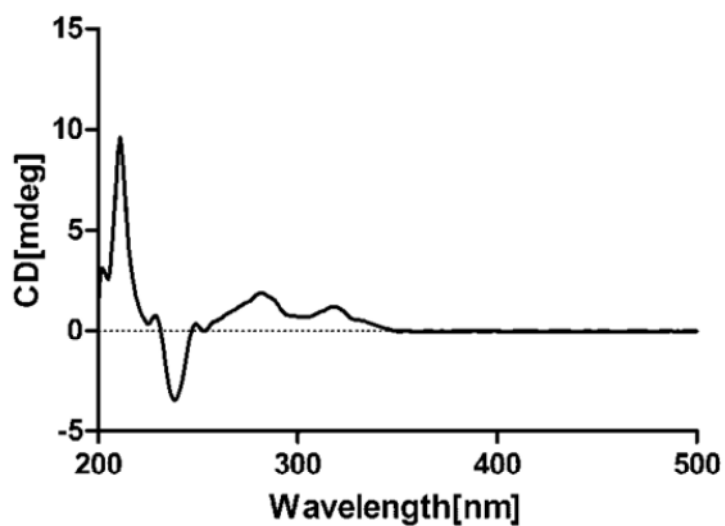

Figure S12. The HRESIMS spectrum of compound 1a.

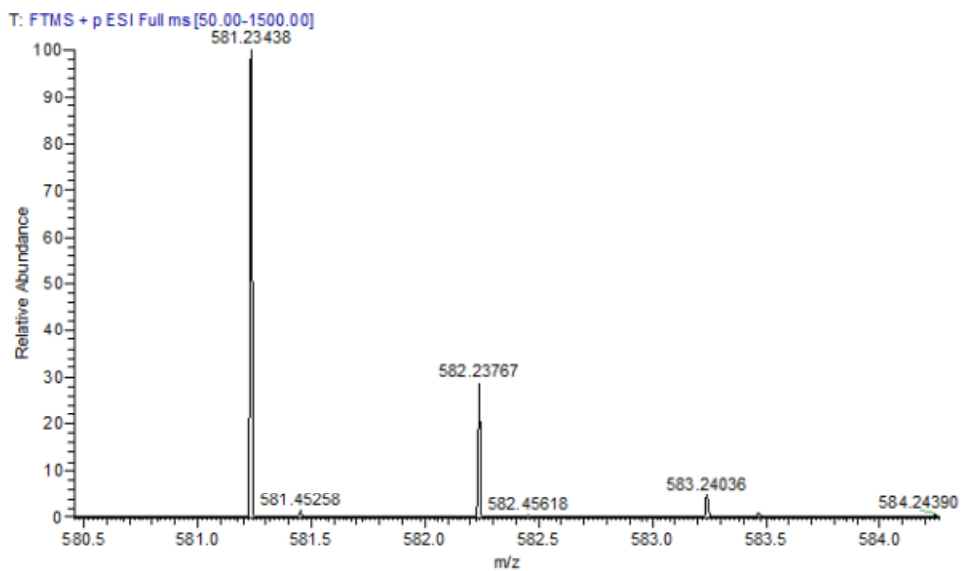

Figure S13. The  $^1\text{H-NMR}$  spectrum of compound 1a.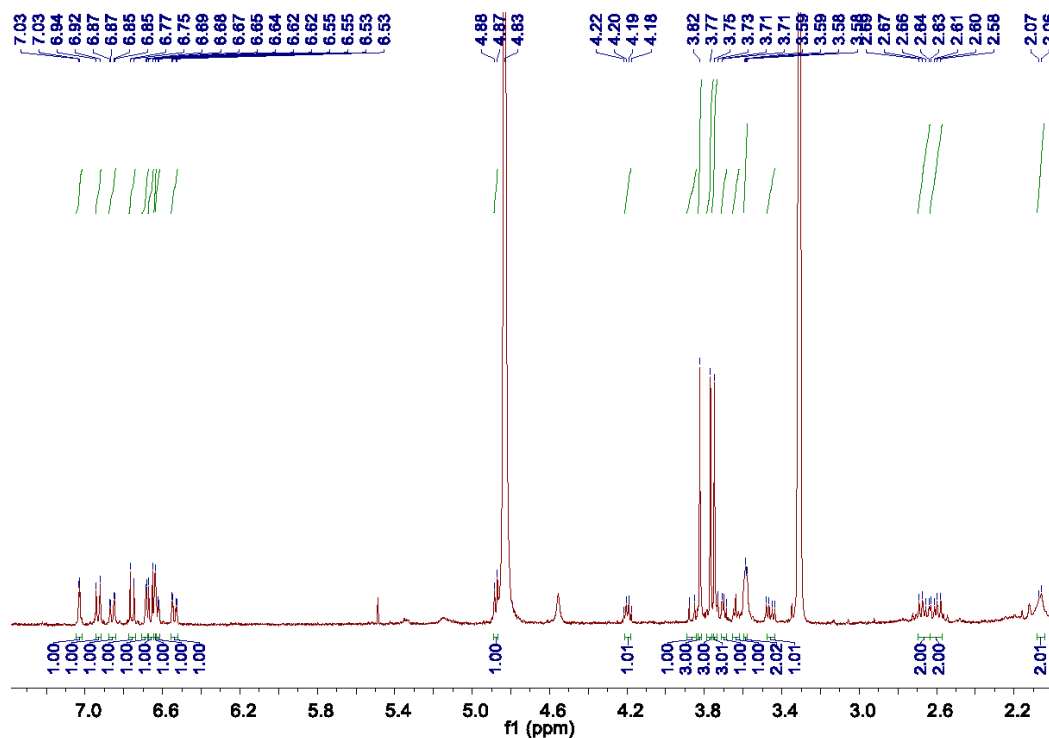Figure S14. The expanded  $^1\text{H-NMR}$  spectrum of 1.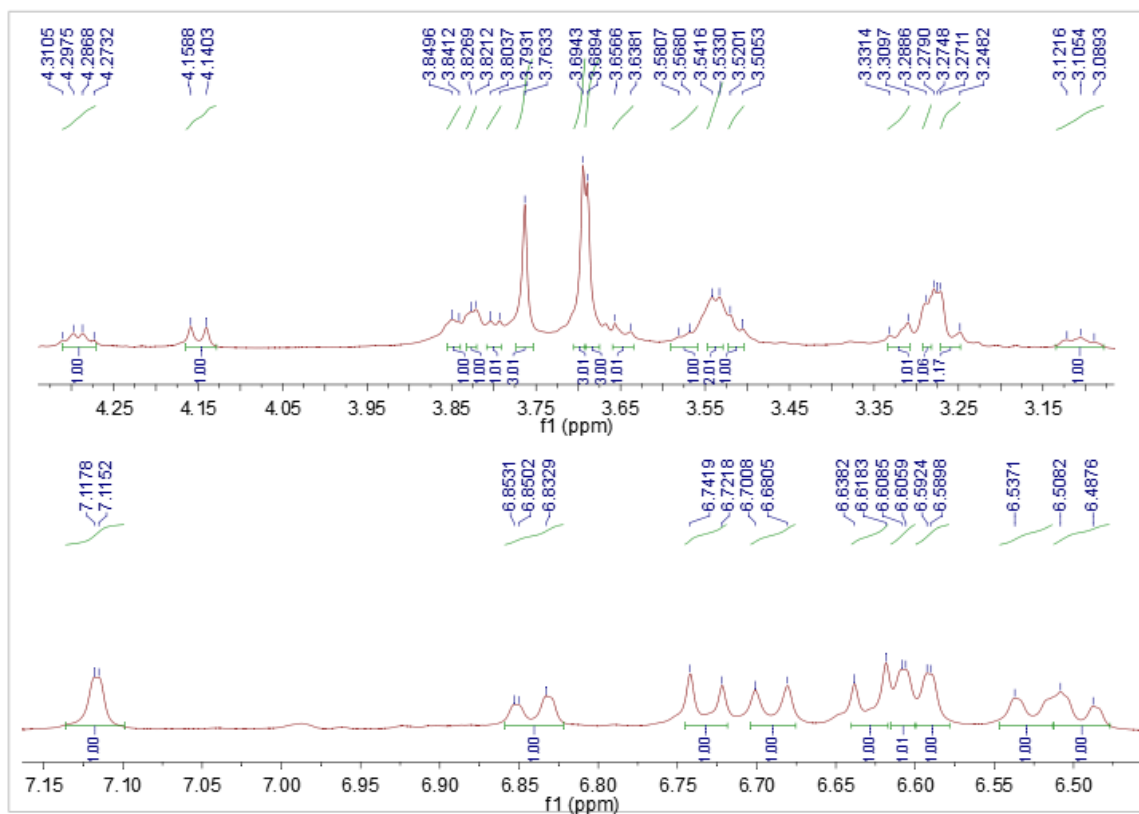

Supplement: molecules-19-01178-s001.pdf [file molecules-19-01178-s001.pdf]
